# Supplementary material for: The (not so) simple prediction of enantioselectivity – a pipeline for high-fidelity computations
Source: Royal Society of Chemistry journal article supplement (doi:10.1039/d2sc01714h), 2022-01-01
Supplement: d2sc01714h2.zip [file d2sc01714h2.zip]

## Sheet: 1A
Structure	Free Energy (Ha)	Free Energy (kcal/mol)	Electronic Energy (Ha)	Electronic Energy (kcal/mol)	Solvation Correction (Ha)	Solvation Correction (kcal/mol)
US-15.log	-2319.45	-1.45547e+06	-2320.16	-1.45592e+06	-0.00305972	-1.92
US-9.log	-2319.44	-1.45547e+06	-2320.16	-1.45592e+06	-0.0021673	-1.36
DR-11.log	-2319.44	-1.45547e+06	-2320.16	-1.45592e+06	-0.00285255	-1.79
DR-12.log	-2319.44	-1.45547e+06	-2320.15	-1.45592e+06	-0.00355373	-2.23
DR-2.log	-2319.45	-1.45547e+06	-2320.17	-1.45592e+06	-0.00435054	-2.73
DR-5.log	-2319.44	-1.45547e+06	-2320.16	-1.45592e+06	-0.00285255	-1.79
DR-6.log	-2319.45	-1.45547e+06	-2320.17	-1.45592e+06	-0.00435054	-2.73
DR-7.log	-2319.44	-1.45547e+06	-2320.16	-1.45592e+06	-0.00352186	-2.21
DS-13.log	-2319.45	-1.45547e+06	-2320.16	-1.45592e+06	-0.00282068	-1.77
DS-14.log	-2319.43	-1.45547e+06	-2320.15	-1.45591e+06	-0.00372903	-2.34
DS-2.log	-2319.44	-1.45547e+06	-2320.15	-1.45592e+06	-0.00576884	-3.62
DS-8.log	-2319.45	-1.45547e+06	-2320.16	-1.45592e+06	-0.00342625	-2.15
UR-11.log	-2319.45	-1.45547e+06	-2320.16	-1.45592e+06	-0.00468519	-2.94
UR-2.log	-2319.45	-1.45548e+06	-2320.17	-1.45593e+06	-0.00267725	-1.68
UR-3.log	-2319.45	-1.45548e+06	-2320.17	-1.45593e+06	-0.00267725	-1.68

## Sheet: 1B
Structure	Free Energy (Ha)	Free Energy (kcal/mol)	Electronic Energy (Ha)	Electronic Energy (kcal/mol)	Solvation Correction (Ha)	Solvation Correction (kcal/mol)
US-10.log	-2244.22	-1.40827e+06	-2244.93	-1.40872e+06	-0.00498798	-3.13
US-12.log	-2244.22	-1.40827e+06	-2244.93	-1.40871e+06	-0.00412743	-2.59
US-1.log	-2244.22	-1.40827e+06	-2244.93	-1.40872e+06	-0.0045577	-2.86
US-2.log	-2244.22	-1.40827e+06	-2244.93	-1.40871e+06	-0.00438241	-2.75
US-4.log	-2244.22	-1.40827e+06	-2244.93	-1.40872e+06	-0.00486049	-3.05
US-5.log	-2244.19	-1.40825e+06	-2244.9	-1.4087e+06	-0.0031394	-1.97
US-6.log	-2244.22	-1.40827e+06	-2244.93	-1.40872e+06	-0.00498798	-3.13
US-8.log	-2244.22	-1.40827e+06	-2244.93	-1.40871e+06	-0.00412743	-2.59
US-9.log	-2244.22	-1.40827e+06	-2244.93	-1.40872e+06	-0.00498798	-3.13
DR-10.log	-2244.22	-1.40827e+06	-2244.93	-1.40872e+06	-0.00479674	-3.01
DR-18.log	-2244.22	-1.40827e+06	-2244.93	-1.40872e+06	-0.00479674	-3.01
DR-5.log	-2244.22	-1.40827e+06	-2244.93	-1.40871e+06	-0.00492423	-3.09
DR-9.log	-2244.2	-1.40825e+06	-2244.91	-1.4087e+06	-0.00403181	-2.53
DS-3.log	-2244.22	-1.40827e+06	-2244.93	-1.40872e+06	-0.0045577	-2.86
DS-5.log	-2244.22	-1.40827e+06	-2244.93	-1.40872e+06	-0.0045577	-2.86
UR-11.log	-2244.2	-1.40826e+06	-2244.91	-1.4087e+06	-0.00344218	-2.16
UR-15.log	-2244.22	-1.40827e+06	-2244.94	-1.40872e+06	-0.00427086	-2.68
UR-2.log	-2244.21	-1.40826e+06	-2244.92	-1.40871e+06	-0.00425492	-2.67
UR-6.log	-2244.21	-1.40826e+06	-2244.93	-1.40871e+06	-0.00385652	-2.42
UR-7.log	-2244.21	-1.40826e+06	-2244.93	-1.40871e+06	-0.00385652	-2.42

## Sheet: 1C
Structure	Free Energy (Ha)	Free Energy (kcal/mol)	Electronic Energy (Ha)	Electronic Energy (kcal/mol)	Solvation Correction (Ha)	Solvation Correction (kcal/mol)
US-0.log	-2126.34	-1.3343e+06	-2126.97	-1.33469e+06	-0.00345812	-2.17
US-14.log	-2126.33	-1.33429e+06	-2126.96	-1.33469e+06	-0.00157767	-0.99
US-15.log	-2126.34	-1.3343e+06	-2126.97	-1.33469e+06	-0.00331469	-2.08
US-4.log	-2126.34	-1.3343e+06	-2126.97	-1.33469e+06	-0.00345812	-2.17
US-7.log	-2126.34	-1.3343e+06	-2126.97	-1.33469e+06	-0.00331469	-2.08
DR-15.log	-2126.34	-1.3343e+06	-2126.97	-1.33469e+06	-0.00203981	-1.28
DR-3.log	-2126.34	-1.3343e+06	-2126.97	-1.33469e+06	-0.00280474	-1.76
DR-4.log	-2126.34	-1.3343e+06	-2126.97	-1.33469e+06	-0.00489236	-3.07
DR-6.log	-2126.34	-1.33429e+06	-2126.97	-1.33469e+06	-0.00465332	-2.92
DR-7.log	-2126.34	-1.3343e+06	-2126.97	-1.33469e+06	-0.00280474	-1.76
DS-10.log	-2126.34	-1.3343e+06	-2126.97	-1.33469e+06	-0.00215136	-1.35
DS-12.log	-2126.34	-1.3343e+06	-2126.97	-1.33469e+06	-0.00188045	-1.18
DS-15.log	-2126.34	-1.3343e+06	-2126.97	-1.33469e+06	-0.00189639	-1.19
DS-1.log	-2126.34	-1.3343e+06	-2126.97	-1.33469e+06	-0.00188045	-1.18
DS-2.log	-2126.34	-1.3343e+06	-2126.97	-1.33469e+06	-0.00293223	-1.84
DS-4.log	-2126.34	-1.3343e+06	-2126.97	-1.33469e+06	-0.00293223	-1.84
DS-5.log	-2126.33	-1.33429e+06	-2126.96	-1.33469e+06	-0.00361748	-2.27
UR-0.log	-2126.34	-1.3343e+06	-2126.97	-1.33469e+06	-0.00148205	-0.93
UR-10.log	-2126.34	-1.3343e+06	-2126.97	-1.3347e+06	-0.00188045	-1.18
UR-11.log	-2126.34	-1.3343e+06	-2126.97	-1.33469e+06	-0.00148205	-0.93
UR-12.log	-2126.34	-1.3343e+06	-2126.97	-1.33469e+06	-0.00148205	-0.93
UR-6.log	-2126.35	-1.3343e+06	-2126.98	-1.3347e+06	-0.00232666	-1.46

## Sheet: 2A
Structure	Free Energy (Ha)	Free Energy (kcal/mol)	Electronic Energy (Ha)	Electronic Energy (kcal/mol)	Solvation Correction (Ha)	Solvation Correction (kcal/mol)
US-10.log	-1936.05	-1.21489e+06	-1936.67	-1.21527e+06	-0.000748993	-0.47
US-12.log	-1936.04	-1.21488e+06	-1936.66	-1.21527e+06	7.96801e-05	0.05
US-13.log	-1936.05	-1.21489e+06	-1936.67	-1.21527e+06	-0.000748993	-0.47
US-15.log	-1936.05	-1.21489e+06	-1936.67	-1.21528e+06	-0.000860545	-0.54
US-16.log	-1936.05	-1.21489e+06	-1936.66	-1.21527e+06	-0.000701185	-0.44
US-2.log	-1936.05	-1.21489e+06	-1936.66	-1.21527e+06	-0.000701185	-0.44
US-6.log	-1936.05	-1.21489e+06	-1936.66	-1.21527e+06	-0.000908354	-0.57
US-9.log	-1936.05	-1.21489e+06	-1936.67	-1.21527e+06	-0.00111552	-0.7
DR-0.log	-1936.05	-1.21489e+06	-1936.67	-1.21528e+06	-0.00170515	-1.07
DR-10.log	-1936.04	-1.21488e+06	-1936.66	-1.21527e+06	-0.00227885	-1.43
DR-11.log	-1936.04	-1.21488e+06	-1936.66	-1.21527e+06	-0.00143424	-0.9
DR-14.log	-1936.04	-1.21488e+06	-1936.66	-1.21527e+06	-0.00117927	-0.74
DR-15.log	-1936.05	-1.21489e+06	-1936.67	-1.21528e+06	-0.002741	-1.72
DR-1.log	-1936.05	-1.21489e+06	-1936.66	-1.21527e+06	-0.00160954	-1.01
DR-4.log	-1936.05	-1.21489e+06	-1936.66	-1.21527e+06	-0.000828673	-0.52
DS-11.log	-1936.05	-1.21489e+06	-1936.66	-1.21527e+06	-0.00221511	-1.39
DS-4.log	-1936.05	-1.21489e+06	-1936.66	-1.21527e+06	-0.000621505	-0.39
DS-6.log	-1936.04	-1.21488e+06	-1936.65	-1.21527e+06	-0.0015936	-1
UR-0.log	-1936.05	-1.21489e+06	-1936.67	-1.21528e+06	-0.000175296	-0.11
UR-4.log	-1936.05	-1.21489e+06	-1936.67	-1.21528e+06	-0.000414337	-0.26
UR-5.log	-1936.05	-1.21489e+06	-1936.66	-1.21527e+06	-0.00165735	-1.04
UR-9.log	-1936.04	-1.21488e+06	-1936.65	-1.21527e+06	-0.000175296	-0.11

## Sheet: 2B
Structure	Free Energy (Ha)	Free Energy (kcal/mol)	Electronic Energy (Ha)	Electronic Energy (kcal/mol)	Solvation Correction (Ha)	Solvation Correction (kcal/mol)
US-10.log	-1860.82	-1.16768e+06	-1861.43	-1.16807e+06	-0.00259757	-1.63
US-16.log	-1860.83	-1.16768e+06	-1861.44	-1.16807e+06	-0.00235853	-1.48
US-1.log	-1860.8	-1.16767e+06	-1861.41	-1.16805e+06	-0.00129082	-0.81
US-2.log	-1860.83	-1.16768e+06	-1861.44	-1.16807e+06	-0.00235853	-1.48
US-3.log	-1860.82	-1.16768e+06	-1861.43	-1.16806e+06	-0.00192826	-1.21
US-9.log	-1860.82	-1.16768e+06	-1861.43	-1.16806e+06	-0.00146611	-0.92
DR-11.log	-1860.81	-1.16768e+06	-1861.43	-1.16806e+06	-0.00213543	-1.34
DR-13.log	-1860.8	-1.16767e+06	-1861.42	-1.16806e+06	-0.00197607	-1.24
DR-15.log	-1860.8	-1.16767e+06	-1861.41	-1.16805e+06	-0.00180077	-1.13
DR-16.log	-1860.82	-1.16768e+06	-1861.43	-1.16807e+06	-0.00184858	-1.16
DR-17.log	-1860.79	-1.16766e+06	-1861.4	-1.16805e+06	-0.00162547	-1.02
DR-18.log	-1860.8	-1.16767e+06	-1861.41	-1.16805e+06	-0.00254976	-1.6
DR-19.log	-1860.82	-1.16768e+06	-1861.43	-1.16807e+06	-0.00310753	-1.95
DR-1.log	-1860.82	-1.16768e+06	-1861.43	-1.16807e+06	-0.00215136	-1.35
DR-22.log	-1860.8	-1.16767e+06	-1861.42	-1.16806e+06	-0.00197607	-1.24
DR-4.log	-1860.82	-1.16768e+06	-1861.43	-1.16807e+06	-0.00310753	-1.95
DR-6.log	-1860.8	-1.16767e+06	-1861.41	-1.16805e+06	-0.00180077	-1.13
DS-0.log	-1860.8	-1.16767e+06	-1861.41	-1.16805e+06	-0.00191232	-1.2
DS-10.log	-1860.82	-1.16768e+06	-1861.43	-1.16806e+06	-0.0023426	-1.47
DS-11.log	-1860.82	-1.16768e+06	-1861.43	-1.16807e+06	-0.00288442	-1.81
DS-12.log	-1860.83	-1.16769e+06	-1861.44	-1.16807e+06	-0.00218324	-1.37
DS-13.log	-1860.82	-1.16768e+06	-1861.44	-1.16807e+06	-0.00178483	-1.12
DS-1.log	-1860.81	-1.16767e+06	-1861.42	-1.16806e+06	-0.00235853	-1.48
DS-2.log	-1860.8	-1.16767e+06	-1861.41	-1.16805e+06	-0.00191232	-1.2
DS-9.log	-1860.79	-1.16766e+06	-1861.4	-1.16805e+06	-0.0025657	-1.61
UR-10.log	-1860.82	-1.16768e+06	-1861.43	-1.16806e+06	-0.00165735	-1.04
UR-12.log	-1860.82	-1.16768e+06	-1861.43	-1.16806e+06	-0.00165735	-1.04
UR-1.log	-1860.82	-1.16768e+06	-1861.43	-1.16807e+06	-0.00264538	-1.66
UR-2.log	-1860.83	-1.16769e+06	-1861.44	-1.16807e+06	-0.00202388	-1.27
UR-3.log	-1860.83	-1.16769e+06	-1861.44	-1.16807e+06	-0.00202388	-1.27
UR-8.log	-1860.82	-1.16768e+06	-1861.43	-1.16806e+06	-0.00165735	-1.04

## Sheet: 2C
Structure	Free Energy (Ha)	Free Energy (kcal/mol)	Electronic Energy (Ha)	Electronic Energy (kcal/mol)	Solvation Correction (Ha)	Solvation Correction (kcal/mol)
US-6.log	-1742.94	-1.09371e+06	-1743.47	-1.09404e+06	1.5936e-05	0.01
DR-0.log	-1742.94	-1.09371e+06	-1743.47	-1.09404e+06	4.78081e-05	0.03
DR-2.log	-1742.94	-1.09371e+06	-1743.47	-1.09405e+06	-0.000669313	-0.42
DR-4.log	-1742.95	-1.09371e+06	-1743.48	-1.09405e+06	-0.00205575	-1.29
DS-10.log	-1742.94	-1.09371e+06	-1743.47	-1.09405e+06	-0.00181671	-1.14
DS-11.log	-1742.93	-1.09371e+06	-1743.46	-1.09404e+06	-0.00124301	-0.78
DS-12.log	-1742.95	-1.09371e+06	-1743.48	-1.09405e+06	-0.000525889	-0.33
DS-1.log	-1742.94	-1.09371e+06	-1743.47	-1.09404e+06	-0.00145018	-0.91
DS-5.log	-1742.94	-1.09371e+06	-1743.47	-1.09404e+06	0.000334657	0.21
UR-10.log	-1742.94	-1.09371e+06	-1743.47	-1.09404e+06	0.000780865	0.49
UR-11.log	-1742.93	-1.09371e+06	-1743.46	-1.09404e+06	-0.000733057	-0.46
UR-12.log	-1742.94	-1.09371e+06	-1743.47	-1.09404e+06	0.000988034	0.62
UR-16.log	-1742.95	-1.09372e+06	-1743.48	-1.09405e+06	-0.000143424	-0.09
UR-3.log	-1742.95	-1.09371e+06	-1743.48	-1.09405e+06	-0.000509953	-0.32
UR-4.log	-1742.94	-1.09371e+06	-1743.47	-1.09404e+06	-3.18721e-05	-0.02
UR-7.log	-1742.94	-1.09371e+06	-1743.47	-1.09404e+06	-4.78081e-05	-0.03

## Sheet: 3A
Structure	Free Energy (Ha)	Free Energy (kcal/mol)	Electronic Energy (Ha)	Electronic Energy (kcal/mol)	Solvation Correction (Ha)	Solvation Correction (kcal/mol)
US-12.log	-1668.92	-1.04726e+06	-1669.47	-1.04761e+06	-0.00180077	-1.13
US-13.log	-1668.92	-1.04727e+06	-1669.47	-1.04761e+06	-0.00232666	-1.46
US-15.log	-1668.93	-1.04727e+06	-1669.47	-1.04761e+06	-0.00227885	-1.43
US-6.log	-1668.91	-1.04726e+06	-1669.46	-1.0476e+06	-0.00145018	-0.91
US-7.log	-1668.92	-1.04726e+06	-1669.47	-1.04761e+06	-0.00192826	-1.21
US-8.log	-1668.92	-1.04726e+06	-1669.47	-1.04761e+06	-0.00218324	-1.37
DR-0.log	-1668.92	-1.04726e+06	-1669.47	-1.04761e+06	-0.00253383	-1.59
DR-10.log	-1668.92	-1.04726e+06	-1669.47	-1.04761e+06	-0.0023904	-1.5
DR-11.log	-1668.92	-1.04726e+06	-1669.47	-1.04761e+06	-0.00243821	-1.53
DR-3.log	-1668.92	-1.04726e+06	-1669.47	-1.04761e+06	-0.00210356	-1.32
DR-4.log	-1668.92	-1.04726e+06	-1669.47	-1.04761e+06	-0.00243821	-1.53
DR-5.log	-1668.92	-1.04726e+06	-1669.46	-1.0476e+06	-0.00275693	-1.73
DR-7.log	-1668.93	-1.04727e+06	-1669.48	-1.04761e+06	-0.00364935	-2.29
DS-11.log	-1668.92	-1.04726e+06	-1669.47	-1.04761e+06	-0.0031394	-1.97
DS-13.log	-1668.92	-1.04727e+06	-1669.47	-1.04761e+06	-0.00259757	-1.63
DS-14.log	-1668.92	-1.04726e+06	-1669.47	-1.04761e+06	-0.00358561	-2.25
DS-17.log	-1668.91	-1.04725e+06	-1669.46	-1.0476e+06	-0.00294816	-1.85
DS-19.log	-1668.92	-1.04727e+06	-1669.47	-1.04761e+06	-0.00320314	-2.01
DS-5.log	-1668.92	-1.04727e+06	-1669.47	-1.04761e+06	-0.0027888	-1.75
UR-11.log	-1668.93	-1.04727e+06	-1669.47	-1.04761e+06	-0.00231072	-1.45
UR-13.log	-1668.92	-1.04726e+06	-1669.47	-1.04761e+06	-0.00168922	-1.06
UR-14.log	-1668.92	-1.04727e+06	-1669.47	-1.04761e+06	-0.00180077	-1.13
UR-2.log	-1668.92	-1.04726e+06	-1669.47	-1.04761e+06	-0.00224698	-1.41
UR-4.log	-1668.93	-1.04727e+06	-1669.48	-1.04761e+06	-0.00207168	-1.3
UR-5.log	-1668.93	-1.04727e+06	-1669.47	-1.04761e+06	-0.00231072	-1.45
UR-7.log	-1668.92	-1.04726e+06	-1669.47	-1.04761e+06	-0.00109959	-0.69
UR-8.log	-1668.92	-1.04726e+06	-1669.47	-1.0476e+06	-0.00167328	-1.05

## Sheet: 3B
Structure	Free Energy (Ha)	Free Energy (kcal/mol)	Electronic Energy (Ha)	Electronic Energy (kcal/mol)	Solvation Correction (Ha)	Solvation Correction (kcal/mol)
US-10.log	-1593.67	-1.00004e+06	-1594.21	-1.00038e+06	-0.0025657	-1.61
US-11.log	-1593.69	-1.00006e+06	-1594.24	-1.0004e+06	-0.00321908	-2.02
US-12.log	-1593.68	-1.00005e+06	-1594.22	-1.00039e+06	-0.00262944	-1.65
US-13.log	-1593.69	-1.00006e+06	-1594.24	-1.0004e+06	-0.00331469	-2.08
US-3.log	-1593.69	-1.00005e+06	-1594.23	-1.00039e+06	-0.00339437	-2.13
US-9.log	-1593.7	-1.00006e+06	-1594.24	-1.0004e+06	-0.00360154	-2.26
DR-0.log	-1593.69	-1.00005e+06	-1594.23	-1.0004e+06	-0.00371309	-2.33
DR-12.log	-1593.67	-1.00004e+06	-1594.22	-1.00039e+06	-0.00315533	-1.98
DR-15.log	-1593.69	-1.00006e+06	-1594.24	-1.0004e+06	-0.00374497	-2.35
DR-3.log	-1593.67	-1.00004e+06	-1594.22	-1.00038e+06	-0.00331469	-2.08
DR-4.log	-1593.69	-1.00005e+06	-1594.23	-1.00039e+06	-0.00403181	-2.53
DR-5.log	-1593.69	-1.00006e+06	-1594.24	-1.0004e+06	-0.0031394	-1.97
DS-0.log	-1593.67	-1.00004e+06	-1594.21	-1.00038e+06	-0.00290036	-1.82
DS-3.log	-1593.69	-1.00006e+06	-1594.24	-1.0004e+06	-0.00380871	-2.39
DS-7.log	-1593.68	-1.00005e+06	-1594.22	-1.00039e+06	-0.00310753	-1.95
DS-8.log	-1593.7	-1.00006e+06	-1594.24	-1.0004e+06	-0.00302785	-1.9
UR-6.log	-1593.69	-1.00006e+06	-1594.24	-1.0004e+06	-0.00301191	-1.89

## Sheet: 3C
Structure	Free Energy (Ha)	Free Energy (kcal/mol)	Electronic Energy (Ha)	Electronic Energy (kcal/mol)	Solvation Correction (Ha)	Solvation Correction (kcal/mol)
US-11.log	-1475.82	-926088	-1476.28	-926378	-0.00106771	-0.67
US-13.log	-1475.81	-926085	-1476.27	-926375	-0.0015936	-1
US-14.log	-1475.82	-926087	-1476.28	-926378	-0.00180077	-1.13
US-18.log	-1475.82	-926089	-1476.28	-926380	-0.00196013	-1.23
US-1.log	-1475.82	-926089	-1476.28	-926380	-0.00237447	-1.49
US-2.log	-1475.82	-926087	-1476.28	-926378	-0.00203981	-1.28
US-3.log	-1475.81	-926084	-1476.27	-926375	-0.000860545	-0.54
US-4.log	-1475.82	-926089	-1476.28	-926380	-0.00196013	-1.23
DR-0.log	-1475.81	-926083	-1476.27	-926373	-0.00240634	-1.51
DR-1.log	-1475.82	-926088	-1476.28	-926379	-0.00186452	-1.17
DR-3.log	-1475.81	-926086	-1476.28	-926377	-0.00247008	-1.55
DR-4.log	-1475.81	-926086	-1476.28	-926377	-0.00247008	-1.55
DR-6.log	-1475.81	-926084	-1476.27	-926375	-0.00310753	-1.95
DS-0.log	-1475.82	-926089	-1476.28	-926379	-0.00192826	-1.21
DS-11.log	-1475.81	-926084	-1476.27	-926374	-0.00181671	-1.14
DS-13.log	-1475.82	-926088	-1476.28	-926378	-0.0015936	-1
DS-5.log	-1475.82	-926087	-1476.28	-926378	-0.00143424	-0.9
DS-7.log	-1475.82	-926089	-1476.28	-926379	-0.00205575	-1.29
UR-10.log	-1475.82	-926087	-1476.28	-926378	-0.00145018	-0.91
UR-19.log	-1475.82	-926089	-1476.28	-926380	-0.00106771	-0.67

## Sheet: 4A
Structure	Free Energy (Ha)	Free Energy (kcal/mol)	Electronic Energy (Ha)	Electronic Energy (kcal/mol)	Solvation Correction (Ha)	Solvation Correction (kcal/mol)
US-10.log	-1826.09	-1.14589e+06	-1826.75	-1.1463e+06	-0.00277287	-1.74
US-9.log	-1826.08	-1.14588e+06	-1826.74	-1.14629e+06	-0.00333063	-2.09
DR-6.log	-1826.08	-1.14588e+06	-1826.74	-1.1463e+06	-0.00309159	-1.94
DR-7.log	-1826.09	-1.14589e+06	-1826.75	-1.1463e+06	-0.00283661	-1.78
DR-9.log	-1826.08	-1.14588e+06	-1826.74	-1.1463e+06	-0.0033625	-2.11
DS-10.log	-1826.08	-1.14588e+06	-1826.74	-1.1463e+06	-0.00356967	-2.24
DS-13.log	-1826.09	-1.14589e+06	-1826.75	-1.1463e+06	-0.00307565	-1.93
DS-17.log	-1826.08	-1.14588e+06	-1826.73	-1.14629e+06	-0.00299597	-1.88
DS-18.log	-1826.07	-1.14588e+06	-1826.73	-1.14629e+06	-0.00431866	-2.71
DS-1.log	-1826.08	-1.14588e+06	-1826.74	-1.14629e+06	-0.00398401	-2.5
DS-2.log	-1826.07	-1.14588e+06	-1826.73	-1.14629e+06	-0.00282068	-1.77
UR-0.log	-1826.08	-1.14588e+06	-1826.74	-1.1463e+06	-0.001992	-1.25
UR-13.log	-1826.08	-1.14588e+06	-1826.74	-1.1463e+06	-0.00321908	-2.02
UR-1.log	-1826.09	-1.14589e+06	-1826.74	-1.1463e+06	-0.00269319	-1.69

[truncated: 2 more sheets: 4B, 4C]
